# Supplementary figures and images for: Longitudinal clinical and neuroanatomical correlates of memory impairment in motor neuron disease
Source: PubMed Central journal article supplement — Neuroimage Clin. 2020 Dec 25;29:102545. doi: 10.1016/j.nicl.2020.102545 (PMC7786131; doi:10.1016/j.nicl.2020.102545), 2020-12-25

Left

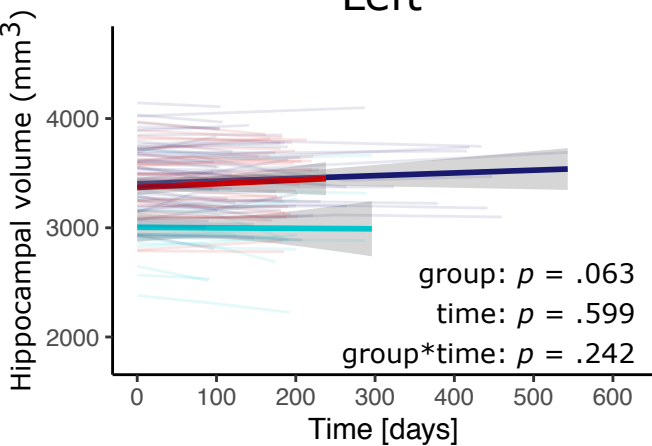

Right

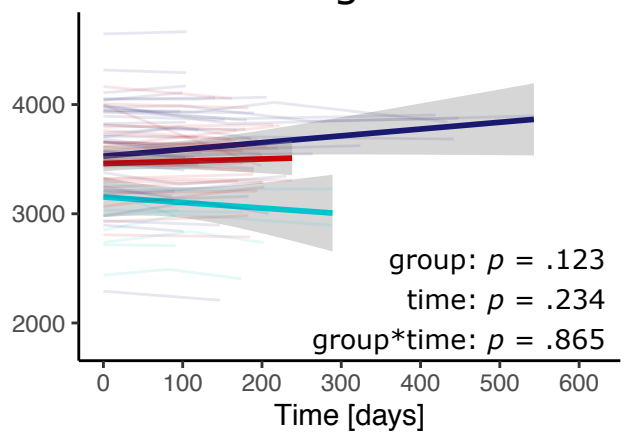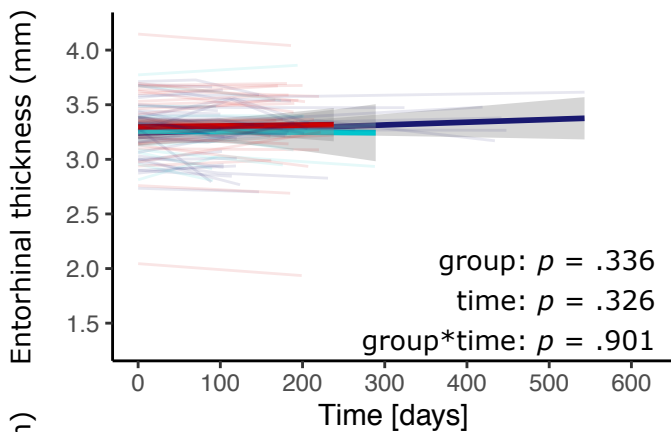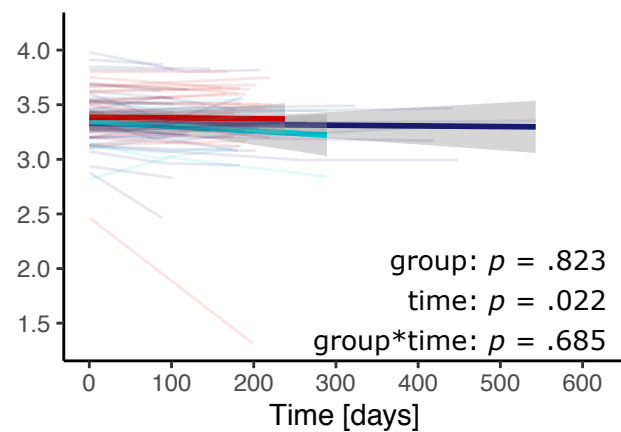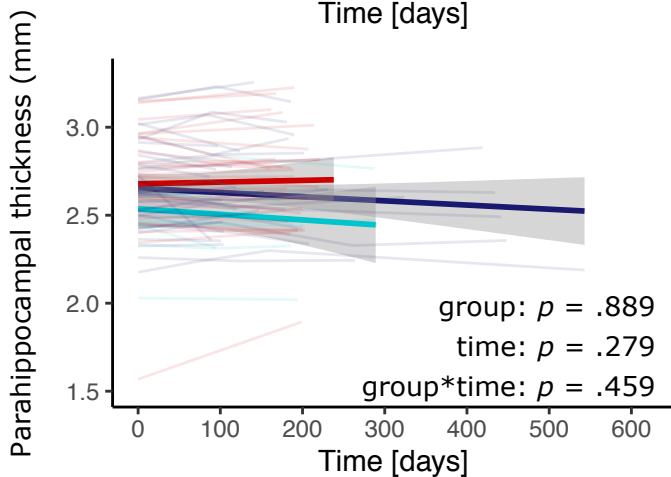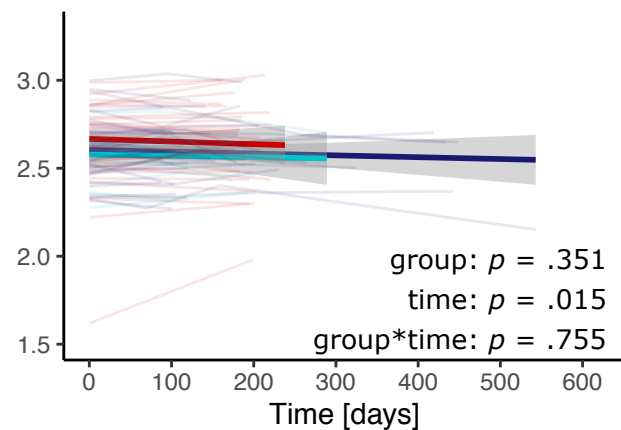

● Healthy controls

● ALS without memory impairment

● ALS with memory impairment

Supplement: mmc4.pdf [file mmc4.pdf]
